# Supplementary material for: Use of genomics to explore AMR persistence in an outdoor pig farm with low antimicrobial usage
Source: PubMed Central journal article supplement (PMC9176276; doi:10.1099/mgen.0.000782), 2022-03-28
Supplement: mgen-8-0782-s001.pdf [file mgen-8-0782-s001.pdf]

## Use of genomics to explore AMR persistence in an outdoor pig farm with low antimicrobial usage.

Nathaniel Storey, Shaun Cawthraw, Olivia Turner, Margherita Rambaldi, Fabrizio Lemma, Robert Horton, Luke Randall, Nicholas A. Duggett, Manal AbuOun, Francesca Martelli, Muna F. Anjum.

### Supplementary Figures and Tables

**Figure S1.** A SNP-based maximum-likelihood tree demonstrating phylogenetic relatedness of 385 *E. coli* isolates sequenced during the study, with branch lengths shown. The branch length indicates genetic relatedness and has been used to define the outlier group, labelled A. The outlier group are further highlighted in Supplementary Table S1 on pairwise SNP distances between isolates.

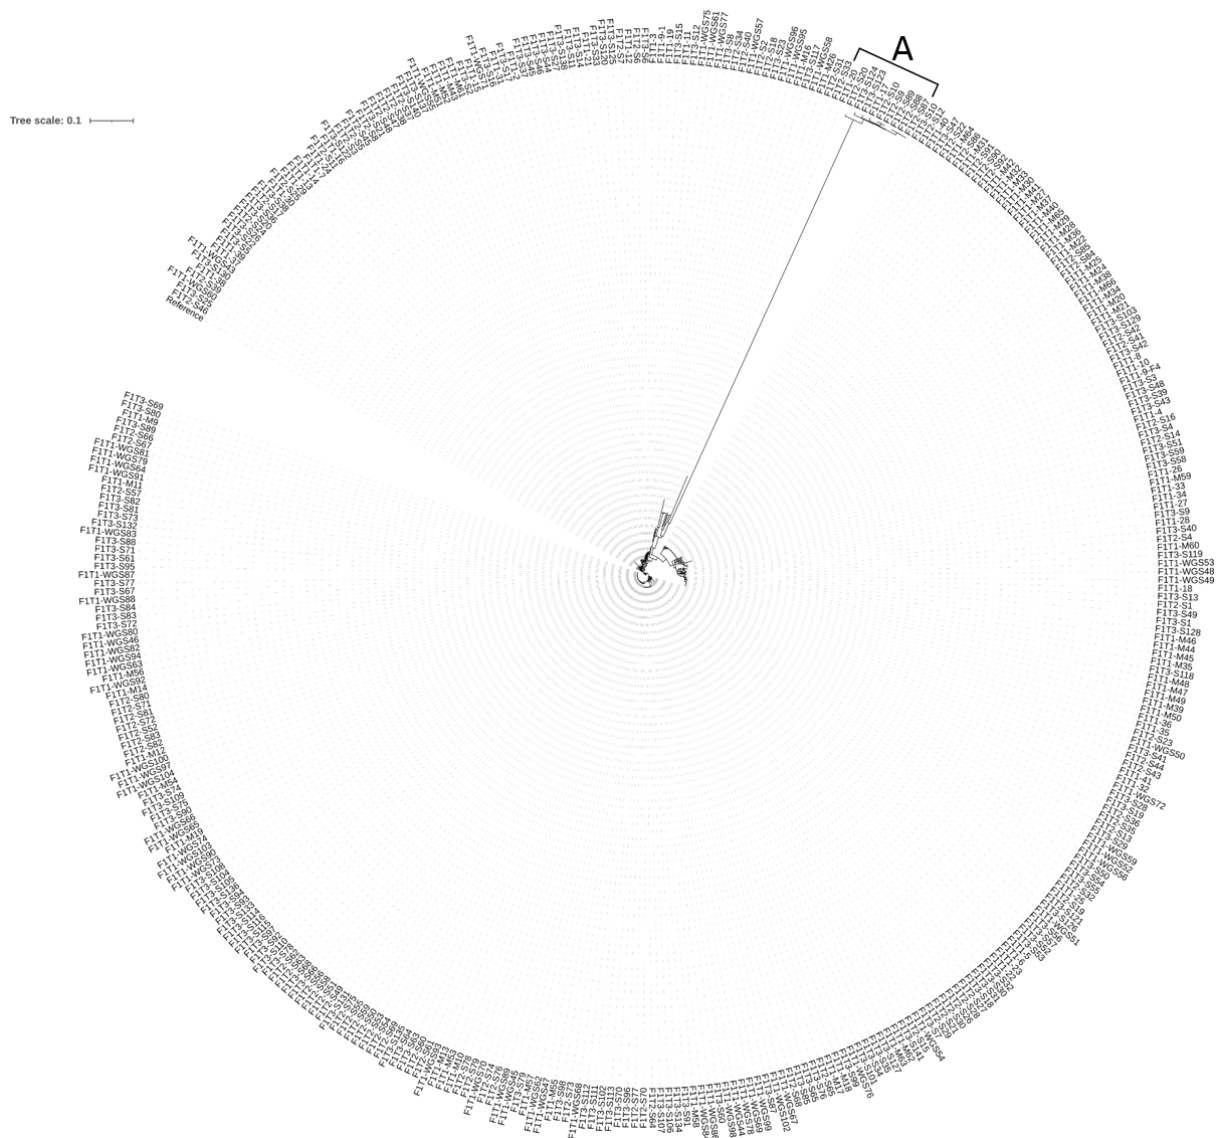

**Fig S2:** Minimum spanning tree demonstrating 62 STs of 346 *E. coli* isolates with selection media. Coloured pie charts denote isolation media distribution of ST, circle size is proportional to number of isolates, predicted clonal complexes denoted in grey. Dotted lines indicate connections between STs with differences of >3 loci. Isolates with no identified ST were excluded from the analysis.

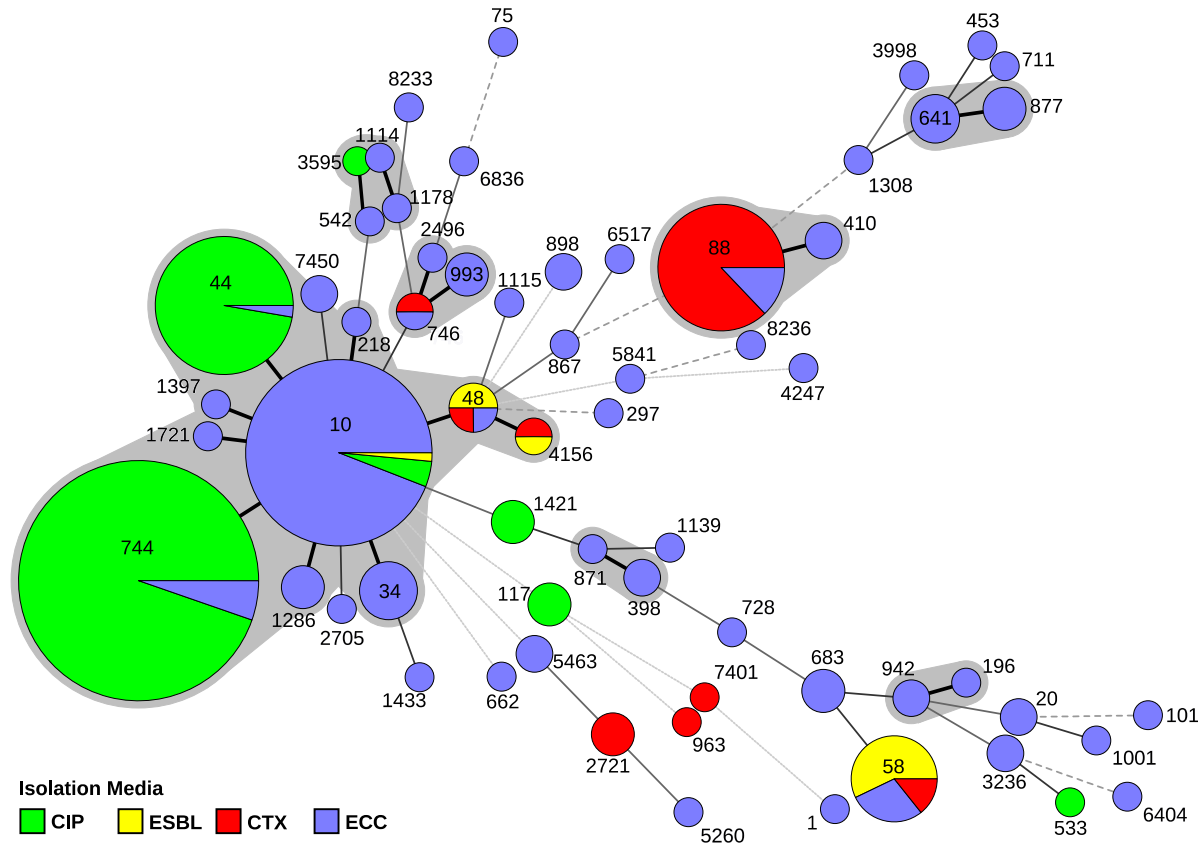

**Figure S3.** Plasmid maps of two plasmids described in this study, pIncY-T1M44 and pIncX-T1M17. Antibiotic resistance genes are indicated in red and BREX phage-resistance genes in blue. Isolates harbouring pIncX-T1M17 are: F1T3-S96, F1T3-S99, F1T2-S65, F1T2-S68, F1T1-M58, F1T1-WGS86, F1T1-WGS98, F1T1-WGS69, F1T1-WGS78, F1T1-WGS99, F1T1-WGS67, F1T1-WGS102, F1T1-WGS76, F1T1-M17, F1T1-M18; and isolates harbouring pIncY-T1M44 are: F1T1-M46, F1T1-M44, F1T1-M35, F1T1-M45, F1T1-M48, F1T1-M47, F1T1-M49, F1T1-M50, F1T1-M39, F1T3-S118.

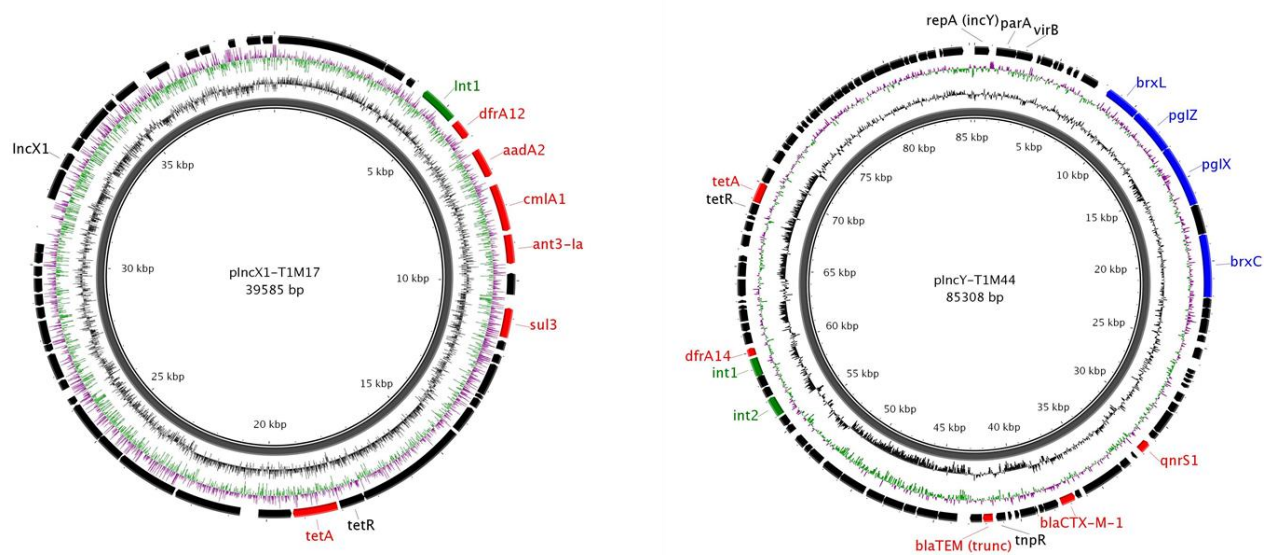

**Table S3.** AMR gene counts by source and time-point as identified by the APHA SeqFinder pipeline, total counts are indicated in grey. \*-indicates presence of mutations in the *ampC* promoter region associated with resistance; \*\* - indicates presence of mutation in the QRDR regions of *gyrA* and *parC* associated with fluoroquinolone resistance.

|                    | Dry |    |    | Dry Total | Farrowing |    |    | Farrowing Total | Gilts |    |    | Gilts Total | Grower/Finisher |    |    | Grower/Finishers Total | Gull |    | Gull Total | Weaners |    | Weaners Total | Grand Total |
|--------------------|-----|----|----|-----------|-----------|----|----|-----------------|-------|----|----|-------------|-----------------|----|----|------------------------|------|----|------------|---------|----|---------------|-------------|
|                    | T1  | T2 | T3 |           | T1        | T2 | T3 |                 | T1    | T2 | T3 |             | T1              | T2 | T3 |                        | T1   | T3 |            | T1      | T3 |               |             |
| <b>amino</b>       |     |    |    |           |           |    |    |                 |       |    |    |             |                 |    |    |                        |      |    |            |         |    |               |             |
| <i>aac6-lb3</i>    | 0   | 0  | 0  | 0         | 0         | 0  | 0  | 0               | 0     | 0  | 0  | 0           | 0               | 1  | 0  | 1                      | 0    | 0  | 0          | 0       | 0  | 0             | 1           |
| <i>aadA1b</i>      | 0   | 0  | 0  | 0         | 0         | 0  | 0  | 0               | 0     | 0  | 1  | 1           | 0               | 0  | 0  | 0                      | 0    | 0  | 0          | 0       | 0  | 0             | 1           |
| <i>aadA2</i>       | 0   | 2  | 2  | 4         | 5         | 0  | 3  | 8               | 2     | 0  | 2  | 4           | 1               | 0  | 0  | 1                      | 1    | 0  | 1          | 5       | 2  | 7             | 25          |
| <i>aadA5</i>       | 9   | 6  | 12 | 27        | 4         | 10 | 4  | 18              | 5     | 11 | 11 | 27          | 2               | 0  | 0  | 2                      | 4    | 4  | 8          | 3       | 0  | 3             | 85          |
| <i>ant3-1a</i>     | 2   | 0  | 1  | 3         | 1         | 0  | 1  | 2               | 4     | 1  | 0  | 5           | 1               | 0  | 1  | 2                      | 0    | 0  | 0          | 2       | 3  | 5             | 17          |
| <i>ant3-la</i>     | 0   | 3  | 2  | 5         | 5         | 0  | 6  | 11              | 2     | 0  | 3  | 5           | 2               | 0  | 0  | 2                      | 2    | 4  | 6          | 5       | 2  | 7             | 36          |
| <i>aph3-la</i>     | 9   | 2  | 9  | 20        | 6         | 2  | 1  | 9               | 7     | 6  | 9  | 22          | 1               | 0  | 0  | 1                      | 3    | 1  | 4          | 3       | 0  | 3             | 59          |
| <i>strA</i>        | 12  | 11 | 12 | 35        | 17        | 11 | 6  | 34              | 11    | 13 | 10 | 34          | 6               | 0  | 2  | 8                      | 8    | 7  | 15         | 14      | 3  | 17            | 143         |
| <i>strB</i>        | 12  | 11 | 14 | 37        | 17        | 11 | 6  | 34              | 10    | 13 | 12 | 35          | 5               | 0  | 2  | 7                      | 7    | 7  | 14         | 14      | 3  | 17            | 144         |
|                    |     |    |    |           |           |    |    |                 |       |    |    |             |                 |    |    |                        |      |    |            |         |    |               |             |
| <b>betaL</b>       |     |    |    |           |           |    |    |                 |       |    |    |             |                 |    |    |                        |      |    |            |         |    |               |             |
| <i>blaCARB-2</i>   | 0   | 0  | 0  | 0         | 1         | 0  | 0  | 1               | 1     | 0  | 0  | 1           | 0               | 0  | 0  | 0                      | 0    | 0  | 0          | 0       | 0  | 0             | 2           |
| <i>blaCMY-2</i>    | 0   | 0  | 0  | 0         | 0         | 0  | 1  | 1               | 0     | 0  | 0  | 0           | 0               | 0  | 0  | 0                      | 0    | 0  | 0          | 0       | 0  | 0             | 1           |
| <i>blaCTX-M-1</i>  | 0   | 3  | 0  | 3         | 0         | 0  | 0  | 0               | 0     | 0  | 0  | 0           | 0               | 0  | 0  | 0                      | 0    | 2  | 2          | 0       | 0  | 0             | 5           |
| <i>blaCTX-M-15</i> | 0   | 0  | 0  | 0         | 6         | 0  | 0  | 6               | 3     | 0  | 1  | 4           | 0               | 0  | 0  | 0                      | 0    | 1  | 1          | 0       | 0  | 0             | 11          |

|                     |    |    |    |    |    |    |    |    |    |    |    |    |   |   |   |   |   |   |    |   |   |    |     |
|---------------------|----|----|----|----|----|----|----|----|----|----|----|----|---|---|---|---|---|---|----|---|---|----|-----|
| <i>bla</i> CTX-M-27 | 0  | 0  | 0  | 0  | 0  | 0  | 0  | 0  | 1  | 0  | 0  | 1  | 0 | 0 | 0 | 0 | 0 | 0 | 0  | 0 | 0 | 0  | 1   |
| <i>bla</i> CTX-M-3  | 0  | 0  | 0  | 0  | 0  | 0  | 0  | 0  | 0  | 0  | 0  | 0  | 0 | 0 | 0 | 0 | 0 | 0 | 3  | 0 | 3 | 3  |     |
| <i>bla</i> CTX-M-55 | 0  | 0  | 0  | 0  | 0  | 0  | 0  | 0  | 0  | 0  | 0  | 0  | 0 | 0 | 0 | 1 | 1 | 0 | 0  | 0 | 0 | 0  | 1   |
| <i>bla</i> OXA-1    | 0  | 0  | 0  | 0  | 0  | 0  | 1  | 1  | 0  | 0  | 0  | 0  | 0 | 0 | 0 | 0 | 0 | 0 | 0  | 0 | 0 | 0  | 1   |
| <i>bla</i> TEM-1    | 0  | 0  | 0  | 0  | 0  | 0  | 0  | 0  | 0  | 0  | 0  | 0  | 0 | 0 | 0 | 1 | 0 | 1 | 0  | 0 | 0 | 0  | 1   |
| <i>bla</i> TEM-59   | 0  | 0  | 0  | 0  | 0  | 0  | 0  | 0  | 0  | 0  | 0  | 0  | 1 | 0 | 1 | 0 | 0 | 0 | 0  | 0 | 0 | 0  | 1   |
| <i>bla</i> TEM-1a   | 0  | 0  | 0  | 0  | 1  | 0  | 0  | 1  | 0  | 0  | 0  | 0  | 0 | 1 | 1 | 1 | 0 | 1 | 0  | 0 | 0 | 0  | 3   |
| <i>bla</i> TEM-1b   | 9  | 7  | 14 | 30 | 15 | 11 | 7  | 33 | 11 | 11 | 15 | 37 | 6 | 1 | 0 | 7 | 3 | 8 | 11 | 4 | 4 | 8  | 126 |
| <i>bla</i> TEM-1d   | 0  | 0  | 0  | 0  | 0  | 0  | 0  | 0  | 0  | 0  | 0  | 0  | 1 | 0 | 0 | 1 | 0 | 1 | 1  | 0 | 0 | 0  | 2   |
| <i>*ampC</i>        | 3  | 4  | 0  | 7  | 9  | 2  | 0  | 11 | 0  | 0  | 0  | 0  | 0 | 0 | 0 | 2 | 0 | 2 | 7  | 0 | 7 | 27 |     |
|                     |    |    |    |    |    |    |    |    |    |    |    |    |   |   |   |   |   |   |    |   |   |    |     |
| <b>chlor</b>        |    |    |    |    |    |    |    |    |    |    |    |    |   |   |   |   |   |   |    |   |   |    |     |
| <i>catA1</i>        | 4  | 0  | 1  | 5  | 6  | 1  | 1  | 8  | 3  | 10 | 0  | 13 | 4 | 0 | 0 | 4 | 5 | 0 | 5  | 1 | 0 | 1  | 36  |
| <i>cml</i>          | 0  | 0  | 0  | 0  | 0  | 0  | 0  | 0  | 1  | 0  | 0  | 1  | 0 | 0 | 0 | 0 | 0 | 0 | 0  | 0 | 0 | 0  | 1   |
| <i>cmlA1</i>        | 2  | 2  | 2  | 6  | 5  | 0  | 3  | 8  | 2  | 0  | 2  | 4  | 1 | 0 | 1 | 2 | 1 | 2 | 3  | 5 | 2 | 7  | 30  |
| <i>floR</i>         | 0  | 0  | 0  | 0  | 0  | 1  | 0  | 1  | 0  | 6  | 0  | 6  | 0 | 0 | 0 | 0 | 0 | 0 | 0  | 0 | 0 | 0  | 7   |
|                     |    |    |    |    |    |    |    |    |    |    |    |    |   |   |   |   |   |   |    |   |   |    |     |
| <b>macro</b>        |    |    |    |    |    |    |    |    |    |    |    |    |   |   |   |   |   |   |    |   |   |    |     |
| <i>mphA</i>         | 7  | 6  | 12 | 25 | 4  | 10 | 4  | 18 | 5  | 11 | 11 | 27 | 2 | 0 | 0 | 2 | 2 | 4 | 6  | 3 | 0 | 3  | 81  |
|                     |    |    |    |    |    |    |    |    |    |    |    |    |   |   |   |   |   |   |    |   |   |    |     |
| <b>quino</b>        |    |    |    |    |    |    |    |    |    |    |    |    |   |   |   |   |   |   |    |   |   |    |     |
| <i>qnrS1</i>        | 0  | 0  | 0  | 0  | 6  | 0  | 0  | 6  | 3  | 0  | 1  | 4  | 0 | 0 | 0 | 0 | 0 | 1 | 1  | 0 | 0 | 0  | 11  |
| <b>**gyrA</b>       | 12 | 10 | 18 | 40 | 16 | 12 | 17 | 45 | 11 | 13 | 17 | 41 | 6 | 0 | 0 | 6 | 6 | 7 | 13 | 9 | 3 | 12 | 157 |
| <b>**parC</b>       | 12 | 10 | 18 | 40 | 16 | 12 | 17 | 45 | 10 | 13 | 17 | 40 | 6 | 0 | 0 | 6 | 6 | 7 | 13 | 9 | 3 | 12 | 156 |

|                    |     |     |     |     |     |     |     |     |     |     |     |     |    |    |    |     |    |     |     |     |    |     |      |
|--------------------|-----|-----|-----|-----|-----|-----|-----|-----|-----|-----|-----|-----|----|----|----|-----|----|-----|-----|-----|----|-----|------|
|                    |     |     |     |     |     |     |     |     |     |     |     |     |    |    |    |     |    |     |     |     |    |     |      |
| <b>strep</b>       |     |     |     |     |     |     |     |     |     |     |     |     |    |    |    |     |    |     |     |     |    |     |      |
| <i>sat2A</i>       | 2   | 0   | 1   | 3   | 1   | 0   | 1   | 2   | 3   | 0   | 1   | 4   | 0  | 2  | 1  | 3   | 0  | 0   | 0   | 3   | 3  | 6   | 18   |
|                    |     |     |     |     |     |     |     |     |     |     |     |     |    |    |    |     |    |     |     |     |    |     |      |
| <b>sulph</b>       |     |     |     |     |     |     |     |     |     |     |     |     |    |    |    |     |    |     |     |     |    |     |      |
| <i>sul1</i>        | 8   | 7   | 12  | 27  | 4   | 10  | 7   | 21  | 5   | 11  | 12  | 28  | 3  | 1  | 0  | 4   | 5  | 8   | 13  | 3   | 0  | 3   | 96   |
| <i>sul2</i>        | 14  | 14  | 14  | 42  | 18  | 13  | 6   | 37  | 9   | 11  | 12  | 32  | 5  | 0  | 0  | 5   | 8  | 7   | 15  | 11  | 3  | 14  | 145  |
| <i>sul3_v1</i>     | 0   | 2   | 2   | 4   | 5   | 0   | 3   | 8   | 2   | 0   | 2   | 4   | 1  | 0  | 0  | 1   | 1  | 0   | 1   | 5   | 2  | 7   | 25   |
|                    |     |     |     |     |     |     |     |     |     |     |     |     |    |    |    |     |    |     |     |     |    |     |      |
| <b>tetra</b>       |     |     |     |     |     |     |     |     |     |     |     |     |    |    |    |     |    |     |     |     |    |     |      |
| <i>tetAB</i>       | 13  | 11  | 15  | 39  | 19  | 12  | 6   | 37  | 9   | 13  | 15  | 37  | 7  | 0  | 2  | 9   | 9  | 6   | 15  | 15  | 0  | 15  | 152  |
| <i>tetA</i>        | 1   | 7   | 1   | 9   | 11  | 1   | 5   | 17  | 10  | 0   | 2   | 12  | 2  | 3  | 4  | 9   | 2  | 7   | 9   | 6   | 1  | 7   | 63   |
| <i>tetB</i>        | 13  | 11  | 15  | 39  | 19  | 12  | 6   | 37  | 9   | 13  | 15  | 37  | 7  | 0  | 2  | 9   | 9  | 6   | 15  | 15  | 0  | 15  | 152  |
|                    |     |     |     |     |     |     |     |     |     |     |     |     |    |    |    |     |    |     |     |     |    |     |      |
| <b>Trime</b>       |     |     |     |     |     |     |     |     |     |     |     |     |    |    |    |     |    |     |     |     |    |     |      |
| <i>dfrA1</i>       | 0   | 1   | 0   | 1   | 0   | 0   | 2   | 2   | 0   | 0   | 1   | 1   | 1  | 2  | 0  | 3   | 1  | 2   | 3   | 0   | 0  | 0   | 10   |
| <i>dfrA12</i>      | 0   | 2   | 2   | 4   | 4   | 0   | 3   | 7   | 1   | 0   | 2   | 3   | 1  | 0  | 0  | 1   | 1  | 0   | 1   | 5   | 2  | 7   | 23   |
| <i>dfrA14</i>      | 0   | 0   | 1   | 1   | 6   | 0   | 0   | 6   | 3   | 0   | 1   | 4   | 0  | 0  | 0  | 0   | 0  | 1   | 1   | 0   | 0  | 0   | 12   |
| <i>dfrA16</i>      | 0   | 0   | 0   | 0   | 1   | 0   | 0   | 1   | 1   | 0   | 0   | 1   | 0  | 0  | 0  | 0   | 0  | 0   | 0   | 0   | 0  | 0   | 2    |
| <i>dfrA17</i>      | 9   | 6   | 12  | 27  | 4   | 10  | 4   | 18  | 5   | 11  | 11  | 27  | 5  | 0  | 0  | 5   | 4  | 4   | 8   | 3   | 0  | 3   | 88   |
| <i>dfrA5</i>       | 0   | 0   | 0   | 0   | 0   | 0   | 0   | 0   | 0   | 0   | 0   | 0   | 0  | 0  | 0  | 0   | 0  | 1   | 1   | 0   | 0  | 0   | 1    |
| <b>Grand Total</b> | 159 | 144 | 206 | 509 | 246 | 150 | 130 | 526 | 165 | 178 | 202 | 545 | 83 | 13 | 17 | 113 | 95 | 112 | 207 | 153 | 40 | 193 | 2093 |

**Table S4.** Statistical analyses of AMR gene count data.

| Data 1 | Data 2 | Statistical Test              | p-value  |
|--------|--------|-------------------------------|----------|
| T1 ECC | T1 CIP | T-test, 2 tail, homoscedastic | 3.34E-24 |
| T2 ECC | T2 CIP | T-test, 2 tail, homoscedastic | 6.69E-27 |
| T3 ECC | T3 CIP | T-test, 2 tail, homoscedastic | 2.61E-29 |
| T1 CIP | T2 CIP | T-test, 2 tail, homoscedastic | 0.043625 |
| T1 CIP | T3 CIP | T-test, 2 tail, homoscedastic | 0.542164 |
| T2 CIP | T3 CIP | T-test, 2 tail, homoscedastic | 0.015854 |

**Table S6.** Gull isolates identified from time-points 1 and 3 as having clones (<14 SNPs) in pig isolates from one or more time-points. Gull isolates are shown alongside time-point, isolation media, sequence type and total number of pig isolates identified as clonal by time-point.

| Gull Isolate | Time Point | Media | ST  | Related pig isolates at time-point: |    |    |
|--------------|------------|-------|-----|-------------------------------------|----|----|
|              |            |       |     | T1                                  | T2 | T3 |
| F1T1-M53     | T1         | CIP   | 744 | 1                                   | 0  | 0  |
| F1T1-M54     | T1         | CIP   | 744 | 4                                   | 0  | 0  |
| F1T1-M56     | T1         | CIP   | 744 | 2                                   | 0  | 0  |
| F1T1-M58     | T1         | CIP   | 44  | 0                                   | 2  | 2  |
| F1T1-M65     | T1         | CTX   | 88  | 6                                   | 3  | 0  |
| F1T1-M66     | T1         | CTX   | 88  | 8                                   | 0  | 0  |
| F1T3-S131*   | T3         | CIP   | 744 | 0                                   | 15 | 14 |
| F1T3-S132    | T3         | CIP   | 744 | 6                                   | 3  | 12 |
| F1T3-S133*   | T3         | CIP   | 744 | 0                                   | 10 | 13 |
| F1T3-S134    | T3         | CIP   | 44  | 0                                   | 2  | 1  |
| F1T3-S135*   | T3         | CIP   | 744 | 0                                   | 15 | 14 |

**Table**

**S7:** Annotation of the pIncY-T1M44 and pIncX-T1M17 plasmids shows *tra* and *mob* genes are missing. The pIncX-T1M17 plasmid contains a *fim* gene but not the full operon.

pIncY-T1M44

| Start | End  | Strand | Protein                                           |
|-------|------|--------|---------------------------------------------------|
| 1     | 861  | +      | RepB family plasmid replication initiator protein |
| 1255  | 2466 | +      | ParA family protein                               |
| 2463  | 3428 | +      | ParB/RepB/Spo0J family partition protein          |
| 3917  | 4633 | +      | IS6-like element IS26 family transposase          |
| 5527  | 6030 | -      | IS1 family transposase                            |
| 6529  | 7533 | +      | IS110 family transposase                          |

|       |       |   |                                                           |
|-------|-------|---|-----------------------------------------------------------|
| 8209  | 10299 | - | protease Lon-related BREX system protein BrxL             |
| 10316 | 12973 | - | BREX-1 system phosphatase PglZ type A                     |
| 12973 | 16602 | - | BREX-1 system adenine specific DNA-methyltransferase PglX |
| 16618 | 18381 | - | DUF262 domain-containing protein                          |
| 18398 | 22075 | - | BREX system P-loop protein BrxC                           |
| 22094 | 22678 | - | DUF1788 domain-containing protein                         |
| 22675 | 23274 | - | DUF1819 family protein                                    |
| 23284 | 23985 | - | WYL domain-containing protein                             |
| 24279 | 24983 | - | hypothetical protein                                      |
| 25031 | 25702 | - | IS3 family transposase                                    |
| 27838 | 28428 | + | plasmid pRiA4b ORF-3 family protein                       |
| 28778 | 29137 | + | resolvase                                                 |
| 29171 | 30565 | + | ISKra4-like element ISKpn19 family transposase            |
| 30589 | 31026 | + | resolvase                                                 |
| 30925 | 31260 | - | hypothetical protein                                      |
| 31345 | 32001 | - | quinolone resistance pentapeptide repeat protein QnrS1    |
| 32893 | 33429 | + | IS3 family transposase                                    |
| 33454 | 36003 | - | Tn3-like element Tn3 family transposase                   |
| 36398 | 36595 | + | cupid fold metalloprotein, WbuC family                    |
| 36642 | 37517 | - | class A extended-spectrum beta-lactamase CTX-M-15         |
| 37687 | 38553 | - | IS3-like element IS3 family transposase                   |
| 38550 | 38849 | - | IS3 family transposase                                    |
| 39034 | 39981 | - | IS1380-like element ISEc9 family transposase              |
| 40477 | 40854 | - | DUF4158 domain-containing protein                         |
| 40823 | 41416 | + | recombinase family protein                                |
| 41599 | 42189 | + | class A beta-lactamase TEM-1b                             |
| 42224 | 42940 | + | IS6-like element IS26 family transposase                  |
| 43641 | 44810 | + | UDP-N-acetylglucosamine 2-epimerase (non-hydrolyzing)     |
| 44804 | 46081 | + | UDP-N-acetyl-D-mannosamine dehydrogenase                  |
| 46119 | 46865 | + | DUF2837 family protein                                    |
| 46894 | 48111 | + | oligosaccharide repeat unit polymerase                    |
| 48131 | 49186 | + | glycosyltransferase family 1 protein                      |
| 49330 | 50955 | + | alginate lyase family protein                             |
| 51213 | 52181 | + | glycosyltransferase WbuB                                  |
| 52367 | 53269 | + | UTP--glucose-1-phosphate uridylyltransferase              |
| 53285 | 53647 | + | UDP-glucose 4-epimerase GalE                              |
| 53682 | 54398 | + | IS6-like element IS26 family transposase                  |
| 54773 | 55225 | + | hypothetical protein                                      |
| 55241 | 55843 | - | hypothetical protein                                      |
| 55979 | 57130 | + | integrase                                                 |
| 57219 | 57809 | + | IS4/IS5 family transposase                                |
| 57844 | 58560 | + | IS6-like element IS26 family transposase                  |
| 58506 | 59618 | - | class 1 integron integrase IntI1                          |
| 59765 | 60247 | + | trimethoprim-resistant dihydrofolate reductase DfrA14     |
| 60482 | 61198 | + | IS6-like element IS26 family transposase                  |



|       |       |   |                                                       |
|-------|-------|---|-------------------------------------------------------|
| 61232 | 61693 | - | hypothetical protein                                  |
| 61830 | 62567 | + | resolvase                                             |
| 63268 | 64272 | - | IS110-like element IS5075 family transposase          |
| 64351 | 66057 | - | Tn3 family transposase                                |
| 66346 | 67752 | + | transposase                                           |
| 68084 | 68761 | - | TetR family transcriptional regulator                 |
| 68765 | 70039 | + | tetracycline efflux MFS transporter Tet(A)            |
| 70071 | 70955 | - | EamA family transporter                               |
| 71444 | 72199 | + | transposase                                           |
| 72338 | 72574 | - | class A beta-lactamase                                |
| 72685 | 73401 | - | IS6-like element IS26 family transposase              |
| 73718 | 74020 | + | XRE family transcriptional regulator                  |
| 74759 | 75286 | - | nuclease                                              |
| 75506 | 76459 | - | hypothetical protein                                  |
| 76580 | 77125 | - | hypothetical protein                                  |
| 77095 | 77541 | - | Fe <sup>3+</sup> siderophore ABC transporter permease |
| 77541 | 77900 | - | hypothetical protein                                  |
| 77958 | 78386 | - | hypothetical protein                                  |
| 78420 | 79280 | - | DsbA family protein                                   |
| 79296 | 80273 | - | S49 family peptidase                                  |
| 80255 | 81109 | - | hypothetical protein                                  |
| 81114 | 81452 | - | hypothetical protein                                  |
| 81418 | 81861 | - | hypothetical protein                                  |
| 81988 | 82509 | - | hypothetical protein                                  |
| 82512 | 82973 | - | hypothetical protein                                  |
| 83456 | 84655 | + | IS91 family transposase                               |

pIncX1-T1M17

| Start | End   | Strand | Protein                                                      |
|-------|-------|--------|--------------------------------------------------------------|
| 90    | 3056  | -      | Tn3-like element TnAs3 family transposase                    |
| 3059  | 3619  | -      | recombinase family protein                                   |
| 3745  | 4329  | -      | DUF3330 domain-containing protein                            |
| 4298  | 5311  | -      | class 1 integron integrase Int1                              |
| 5456  | 5953  | +      | trimethoprim-resistant dihydrofolate reductase DfrA12        |
| 6361  | 7152  | +      | ANT(3)-Ia family aminoglycoside nucleotidyltransferase AadA2 |
| 7501  | 8673  | +      | chloramphenicol efflux MFS transporter CmlA1                 |
| 8766  | 9557  | +      | ANT(s)-Ia family aminoglycoside nucleotidyltransferase AadA1 |
| 9795  | 10403 | -      | IS256 family transposase                                     |
| 10728 | 11519 | -      | sulfonamide-resistant dihydropteroate synthase Sul3          |
| 12271 | 13134 | -      | SDR family oxidoreductase                                    |
| 13280 | 13534 | -      | macrolide efflux MFS transporter Mef(B) truncated            |
| 13592 | 14308 | -      | IS6-like element IS26 family transposase                     |
| 14382 | 17348 | +      | Tn3-like element TnAs1 family transposase                    |
| 17345 | 18028 | -      | TetR family transcriptional regulator                        |
| 18032 | 19306 | +      | tetracycline efflux MFS transporter Tet(A)                   |

|       |       |   |                                                      |
|-------|-------|---|------------------------------------------------------|
| 19338 | 20222 | - | EamA family transporter                              |
| 20360 | 20524 | - | isochorismatase family protein                       |
| 20711 | 22507 | + | Tn3 family transposase                               |
| 22559 | 24241 | + | fimbrial biogenesis outer membrane usher protein     |
| 24254 | 25012 | + | gram-negative pili assembly chaperone domain protein |
| 25014 | 26078 | + | hypothetical protein                                 |
| 26891 | 27607 | + | hypothetical protein                                 |
| 27871 | 28512 | - | restriction endonuclease                             |
| 28568 | 28801 | - | hypothetical protein                                 |
| 28915 | 29229 | - | KikA protein                                         |
| 29270 | 29773 | - | IS1 transposase                                      |
| 31798 | 32634 | + | RepB family plasmid replication initiator protein    |
| 33188 | 33613 | + | putative DNA distortion polypeptide 3                |
| 33610 | 34587 | - | hypothetical protein                                 |
| 34612 | 34920 | - | hypothetical protein                                 |
| 34991 | 35653 | - | peptidyl-arginine deiminase                          |
| 36034 | 36678 | + | resolvase                                            |
| 37141 | 37644 | - | IS1 family transposase                               |
| 38833 | 39336 | - | IS1 family transposase                               |

**Table S8:** Results from mobtyper\* predicts plncX1-T1M17 and plncY-T1M44 to be non-mobilisable plasmids.

| sample_id          | num_contigs | size | gc       | md5                              | rep_type(s) | rep_type_accession(s)  | relaxase_type(s) | relaxase_type_accession(s) | mpf_type | mpf_type_accession(s) | orit_type(s) | orit_accession(s) | predicted_mobilability | mash_nearest_neighbor | mash_neighbor_distance | mash_neighbor_identification | primary_cluster_id | secondary_cluster_id | observed_host_range_ncbi_name | associated_pmid(s) |
|--------------------|-------------|------|----------|----------------------------------|-------------|------------------------|------------------|----------------------------|----------|-----------------------|--------------|-------------------|------------------------|-----------------------|------------------------|------------------------------|--------------------|----------------------|-------------------------------|--------------------|
| plncX-T1M17_pk.fna | 1           | -    | 51.3831  | 29c5f8f48bc140e6c795adbc85ab8d96 | IncX1       | 000215__KC853434_00019 | -                | -                          | -        | -                     | -            | -                 | non-mobilizable        | CP042589              | 0.010188               | Escherichia coli             | AB718              | AK607                | Enterobacterales              | 21625636; 22470007 |
| plncY-T1M44_pk.fna | 1           | -    | 48.99423 | 27f81fb33904d98edfa7a751d6cdb70c | IncY        | 000230__CP009168_00001 | -                | -                          | -        | -                     | -            | -                 | non-mobilizable        | MF510423              | 0.016275               | Escherichia coli             | AC315              | AL455                | Enterobacteriaceae            | 28031198           |
